# Supplementary material for: Linking Cortical Morphology and Neurophysiological Dynamics in Parkinson's Disease
Source: Research Square preprint supplement (doi:10.21203/rs.3.rs-7992155/v1), 2025-11-24
Supplement: Supplementary file 1 [file 01b3bcdaa02011c270b2af1d.docx]

|  | Physiology | Anatomy | UPDRS score | Age |
| --- | --- | --- | --- | --- |
| Physiology | - | - | - | - |
| Anatomy | **0.701 (p<<0.001)** | - | - | - |
| UPDRS score | -0.182 (p=0.244) | -0.003 (p=0.984) | - | - |
| Age | -0.292 (p=0.057) | **0.327 (p=0.032)** | 0.022 (p=0.887) |  |
| Years since diagnosis | **0.382 (p=0.012)** | -0.093 (p=0.554) | 0.216 (p=0.165) | 0.092 (p=0.557) |
