# Supplementary material for: Linking Cortical Morphology and Neurophysiological Dynamics in Parkinson's Disease
Source: Research Square preprint supplement (doi:10.21203/rs.3.rs-7992155/v1), 2025-11-24
Supplement: Supplementary file 2 [file 77d4ab2006cf64341f8ca484.docx]

| BIOMARKER | WEIGHT |
| --- | --- |
| **BA3b Gray Vol** | **-0.017552** |
| BA6 Gray Vol | -0.17451 |
| BA1 Thick Avg | -0.47115 |
| **BA2 Thick Avg** | **-0.32683** |
| BA3a Thick Avg | -0.29708 |
| **BA3b Thick Avg** | **-0.58596** |
| BA4a Thick Avg | -0.2302 |
| **BA6 Thick Avg** | **- 0.39477** |
