# Supplementary material for: Linking Cortical Morphology and Neurophysiological Dynamics in Parkinson's Disease
Source: Research Square preprint supplement (doi:10.21203/rs.3.rs-7992155/v1), 2025-11-24
Supplement: Supplementary file 3 [file c45973232f625f55eb190066.docx]

|  | Subject | Age | Gender | Years since diagnosis | UPDRS III score |
| --- | --- | --- | --- | --- | --- |
| 1 | UTbG03 | 42 | M | 5 | 26 |
| 2 | UTbG07 | 68 | M | 2 | 53 |
| 3 | UTbG08 | 64 | M | 6 | 17 |
| 4 | UTbG09 | 60 | F | 8 | 33 |
| 5 | UTbG10 | 71 | F | 9 | 17 |
| 6 | UTbG11 | 53 | M | 7 | missing |
| 7 | UTbG12 | 71 | M | 10 | 36 |
| 8 | UTbG13 | 68 | M | 1 | 34 |
| 9 | UTbG14 | 59 | M | 2 | 35 |
| 10 | UTbG15 | 74 | M | 10 | 35 |
| 11 | UTbG16 | 66 | M | 9 | 48 |
| 12 | UTbG17 | 70 | F | 8 | 52 |
| 13 | UTbG18 | 67 | M | 8 | 62 |
| 14 | UTlG01 | 76 | F | 1 | 42 |
| 15 | UTlG02 | 66 | M | 1 | 70 |
| 16 | UTrG02 | 66 | M | 15 | 70 |
| 17 | UCbG01 | 61 | M | 7 | 55 |
| 18 | UCbG02 | 63 | M | 14 | 32 |
| 19 | UCbG03 | 78 | F | 8 | partial |
| 20 | UCbG06 | 65 | M | 17 | 16 |
| 21 | UCbG09 | 63 | M | 5 | 48 |
| 22 | UCbG10 | 72 | M | 4 | 31 |
| 23 | UCbG12 | 76 | F | 9 | 29 |
| 24 | UCbG13 | 59 | M | 11 | 27 |
| 25 | UCbG17 | 72 | M | 21 | 43 |
| 26 | UCbG18 | 67 | F | 15 | 39 |
| 27 | UCbG19 | 58 | M | 7 | 74 |
| 28 | UCbG20 | 60 | M | 7 | 33 |
| 29 | UCbG21 | 52 | M | 5 | 53 |
| 30 | UCbG22 | 57 | M | 5 | 18 |
| 31 | UCbG24 | 60 | M | 12 | 22 |
| 32 | UCbG25 | 70 | M | 19 | 40 |
| 33 | UCbG26 | 69 | M | 7 | 48 |
| 34 | UCbG27 | 61 | F | 6 | 30 |
| 35 | UCbG28 | 61 | M | 12 | 38 |
| 36 | UCbG29 | 73 | F | 11 | 69 |
| 37 | UCbG30 | 57 | F | 8 | 51 |
| 38 | UCbG38 | 64 | F | 10 | 34 |
| 39 | UCbG63 | 68 | M | 10 | 32 |
| 40 | UCbG65 | 52 | M | 17 | 35 |
| 41 | UCbG66 | 61 | F | 13 | 44 |
| 42 | UCbG67 | 57 | M | 4 | 22 |
| 43 | UCbG69 | 68 | M | 6 | 37 |
| 44 | UCbG70 | 57 | M | 16 | missing |
| 45 | UCbG71 | 71 | M | 10 | 28 |
| 46 | UCbG72 | 80 | M | 8 | 28 |
| 47 | UCbG73 | 68 | F | 6 | 31 |
| 48 | UCbG75 | 61 | M | 16 | 44 |
| 49 | UClG01 | 55 | M | 5 | partial |
| 50 | UCrG01 | 61 | M | 2 | 41 |
