# Supplementary material for: Linking Cortical Morphology and Neurophysiological Dynamics in Parkinson's Disease
Source: Research Square preprint supplement (doi:10.21203/rs.3.rs-7992155/v1), 2025-11-24
Supplement: Supplementary file 4 [file c9ed6efba9b66d90618115eb.docx]

| biomarker | wEIGHT |
| --- | --- |
| Power Alpha S1 | -0.086 |
| Power Alpha M1 | -0.067 |
| Power Alpha PM | -0.028 |
| Burst Duration Alpha S1 | -0.037 |
| Burst Duration Alpha M1 | -0.332 |
| Burst Duration Hbeta M1 | -0.087 |
| Burst Duration Alpha PM | -0.101 |
| Burst Duration Lbeta PM | -0.180 |
| Burst Duration Lbeta Sub Cort | -0.076 |
| Burst Amp Alpha M1 | -0.037 |
| Burst Amp Gamma M1 | 0.050 |
| Burst Amp Alpha PM | -0.283 |
| **Burst Amp Lbeta PM** | **-0.242** |
| Burst Amp Gamma PM | 0.279 |
| Burst Amp Alpha Sub-Cort | -0.148 |
| Burst Amp Hbeta Sub-Cort | 0.150 |
| Burst Amp Gamma Sub-Cort | 0.311 |
| Burst Rate Alpha S1 | 0.090 |
| Burst Rate Hbeta S1 | 0.063 |
| Burst Rate Alpha M1 | 0.407 |
| **Burst Rate Lbeta M1** | **0.182** |
| **Burst Rate Hbeta M1** | **0.198** |
| **Burst Rate Alpha PM** | **0.228** |
| **Burst Rate Lbeta PM** | **0.256** |
| Burst Rate Hbeta PM | 0.022 |
| **Burst Rate Alpha Sub-Cort** | **0.114** |
| **Burst Rate Lbeta Sub-Cort** | **0.202** |
| Coherence CC Hbeta PM | 0.088 |
| **Coherence CC Gamma PM** | **0.171** |
