# Supplementary material for: Linking Cortical Morphology and Neurophysiological Dynamics in Parkinson's Disease
Source: Research Square preprint supplement (doi:10.21203/rs.3.rs-7992155/v1), 2025-11-24
Supplement: Supplementary file 5 [file f107bc96ac595eb1382c6867.docx]

| split | Training  correlation | Test  correlation | p-val | physiology features | Anatomy features | sig adjusted bh Pval |
| --- | --- | --- | --- | --- | --- | --- |
| 1 | **0.715** | **0.615** | **0.025** | **27** | **3** | **0.025** |
| 2 | **0.717** | **0.71** | **0.011** | **17** | **1** | **0.02** |
| 3 | 0.735 | 0.539 | 0.054 | 29 | 3 | 0.03 |
| 4 | 0.724 | 0.233 | 0.266 | 49 | 1 | 0.045 |
| 5 | 0.588 | -0.013 | 0.517 | 1 | 1 | 0.05 |
| 6 | **0.706** | **0.758** | **0.006** | **28** | **1** | **0.01** |
| 7 | **0.726** | **0.695** | **0.009** | **31** | **1** | **0.015** |
| 8 | 0.747 | 0.382 | 0.111 | 18 | 1 | 0.035 |
| 9 | **0.688** | **0.818** | **0.001** | **29** | **8** | **0.005** |
| 10 | 0.739 | 0.409 | 0.118 | 23 | 7 | 0.04 |
